# Supplementary material
Source: PubMed Central journal article supplement (PMC5573794)
Supplement: NIHMS839000-supplement.pdf [file NIHMS839000-supplement.pdf]

## Supplemental Table

### Raw Video Intensity Values From the First Post-destructive Frame (Background)

|        | Optison | Definity | Sonazoid | ANOVA<br>p-value |
|--------|---------|----------|----------|------------------|
| MI 0.1 | 23±17   | 23±13    | 23±9     | 0.99             |
| MI 0.3 | 30±17   | 38±10    | 37±12    | 0.63             |

MI, mechanical index;

## Supplemental Figure

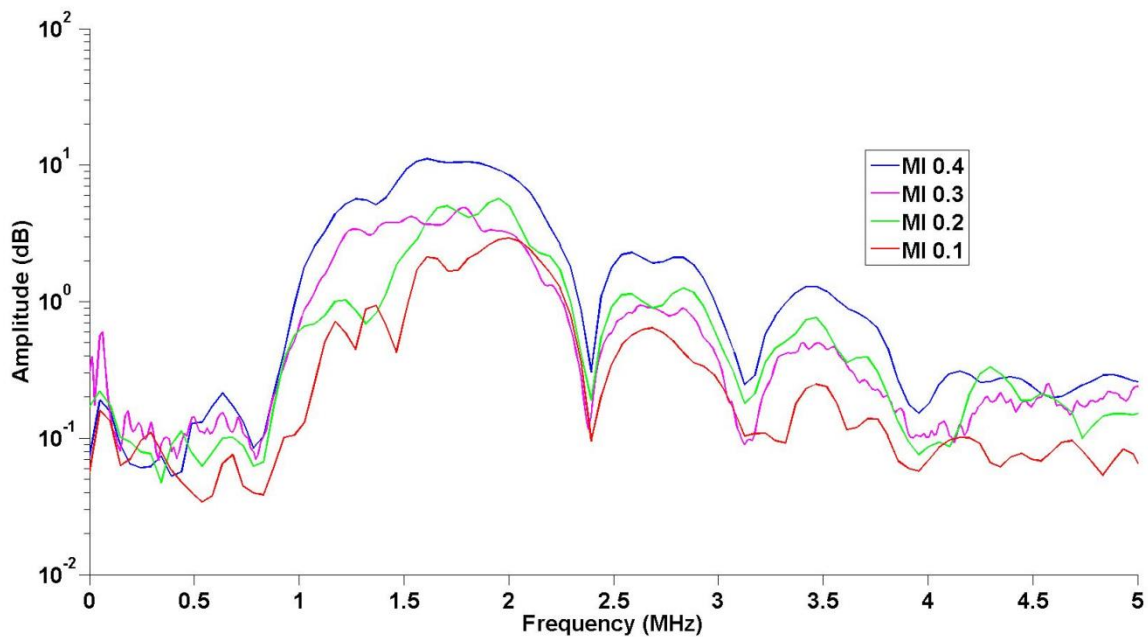

**In vivo Passive Cavitation Detection.** Amplitude-frequency histograms for Sonazoid obtained during CEU perfusion imaging at rest. Harmonic peaks produced by stable cavitation increase with mechanical index (MI) while the broad-band signal produced by inertial cavitation stay modest and is detected only at  $MI \geq 0.3$ .
